# Supplementary material for: Insights on 21 Years of HBV Surveillance in Blood Donors in France
Source: MDPI journal article supplement (doi:10.3390/v14112507), 2022-11-12
Supplement: s1 [file s1]

Article

# Insights on 21 years of HBV surveillance in blood donors in France

Pierre CAPPY<sup>a,b,\*</sup>, Laure BOIZEAU<sup>a,b\*</sup>, Daniel CANDOTTI<sup>a,b</sup>, Sophie LE CAM<sup>c</sup>, Christophe MARTINAUD<sup>d</sup>, Josiane PILLONEL<sup>e</sup>, Martin TRIBOUT<sup>f</sup>, Claude MAUGARD<sup>f</sup>, Josiane RELAVE<sup>f</sup>, Pascale RICHARD<sup>c</sup>, Pascal MOREL<sup>c,g</sup> and Syria LAPERCHÉ<sup>b,c</sup>

<sup>a)</sup> Department of Microbiology, Henri Mondor University Hospital, Assistance Publique-Hôpitaux de Paris, Créteil, France

<sup>b)</sup> National Reference Centre for Transfusion Infectious Risks, Institut National de la Transfusion Sanguine (INTS), Paris, France

<sup>c)</sup> Etablissement Français du Sang (EFS), La Plaine St-Denis, France

<sup>d)</sup> Centre de transfusion des Armées (CTSA), Clamart, France

<sup>e)</sup> Santé Publique France, Saint Maurice, France

<sup>f)</sup> Etablissement Français du Sang Occitanie (EFS Occitanie), France

<sup>g)</sup> UMR 1098 RIGHT, INSERM, Université de Franche-Comté, Besançon, France

\* Both authors contributed equally to this paper.

\* Correspondence: pierre.cappy@aphp.fr

## SUPPLEMENTARY MATERIAL

**Supplementary Table S1.** Number and rates of donations and donors screened for HBV from 2000 to 2020 in France.

| Donation year                           | 2000      | 2001      | 2002       | 2003      | 2004      | 2005       | 2006      | 2007      | 2008        | 2009      | 2010      |
|-----------------------------------------|-----------|-----------|------------|-----------|-----------|------------|-----------|-----------|-------------|-----------|-----------|
| Number of donations                     | 2 475 102 | 2 409 484 | 2 459 663  | 2 465 382 | 2 498 298 | 2 512 795  | 2 575 273 | 2 713 582 | 2 818 689   | 3 001 321 | 3 004 863 |
| Number of donors                        | 1 530 000 | 1 522 000 | 1 537 000  | 1 523 000 | 1 535 900 | 1 506 082  | 1 527 209 | 1 635 578 | 1 643 493   | 1 701 018 | 1 662 994 |
| Number of FTBD                          | 386 000   | 382 000   | 352 000    | 358 733   | 382 640   | 352 348    | 363 175   | 395 919   | 416 367     | 435 693   | 368 076   |
| Number of RBD                           | 1 144 000 | 1 140 000 | 1 185 000  | 1 164 267 | 1 153 260 | 1 153 734  | 1 164 034 | 1 239 659 | 1 227 126   | 1 265 325 | 1 294 918 |
| HBV all donors                          | 438       | 444       | 433        | 451       | 424       | 351        | 333       | 381       | 344         | 327       | 234       |
| Rate per 10 000 donations               | 1,77      | 1,84      | 1,76       | 1,83      | 1,70      | 1,40       | 1,29      | 1,40      | 1,22        | 1,09      | 0,78      |
| HBV in FTBD                             | 431       | 434       | 424        | 447       | 420       | 346        | 327       | 375       | 339         | 322       | 224       |
| Prevalence in FTBD (per 10 000)         | 11,2      | 11,4      | 12,0       | 12,5      | 11,0      | 9,8        | 9,0       | 9,5       | 8,1         | 7,4       | 6,1       |
| Incidence <sup>1</sup> (per 100 000 PY) |           |           | 1,66       |           |           | 0,4        |           |           | 0,98        |           |           |
| (CI95%)                                 |           |           | (1,2-2,29) |           |           | (0,2-0,78) |           |           | (0,64-1,48) |           |           |

| Donation year                   | 2011        | 2012      | 2013      | 2014        | 2015      | 2016      | 2017        | 2018      | 2019      | 2020        | Total             |
|---------------------------------|-------------|-----------|-----------|-------------|-----------|-----------|-------------|-----------|-----------|-------------|-------------------|
| Number of donations             | 3 149 090   | 3 038 143 | 2 760 422 | 2 813 170   | 2 958 120 | 2 918 611 | 2 958 128   | 2 926 942 | 2 891 828 | 2 812 078   | <b>58 160 984</b> |
| Number of donors                | 1 718 320   | 1 705 209 | 1 639 942 | 1 600 072   | 1 660 599 | 1 616 268 | 1 624 221   | 1 636 524 | 1 622 519 | 1 589 491   | <b>33 737 439</b> |
| Number of FTBD                  | 397 010     | 382 955   | 357 510   | 350 333     | 325 813   | 279 454   | 288 969     | 293 456   | 289 966   | 256 262     | <b>7 414 679</b>  |
| Number of RBD                   | 1 321 310   | 1 322 254 | 1 282 432 | 1 249 739   | 1 334 786 | 1 336 814 | 1 335 252   | 1 343 068 | 1 332 553 | 1 333 229   | <b>26 322 760</b> |
| HBV all donors                  | 264         | 280       | 223       | 256         | 225       | 165       | 189         | 139       | 143       | 105         | <b>6 149</b>      |
| Rate per 10 000 donations       | 0,84        | 0,92      | 0,81      | 0,91        | 0,76      | 0,57      | 0,64        | 0,47      | 0,49      | 0,37        | <b>1,06</b>       |
| HBV in FTBD                     | 257         | 272       | 220       | 255         | 217       | 162       | 178         | 137       | 138       | 100         | <b>6 025</b>      |
| Prevalence in FTBD (per 10 000) | 6,5         | 7,1       | 6,2       | 7,3         | 6,7       | 5,8       | 6,2         | 4,7       | 4,8       | 3,9         | <b>8,13</b>       |
| Incidence (per 100 000 PY)      | 0,61        |           |           | 0,26        |           |           | 0,74        |           |           | 0,26        |                   |
| (CI95%)                         | (0,37-1,02) |           |           | (0,11-0,56) |           |           | (0,46-1,17) |           |           | (0,11-0,57) |                   |

FTBD: first time blood donor, RBD: Repeat blood donor, PY: persons/years

<sup>1</sup>: estimated in repeat blood donors in 3 year-periods
